# Supplementary material for: A Cross-Sectional Study Based on Forty Systematic Reviews of Foods with Function Claims (FFC) in Japan: Quality Assessment Using AMSTAR 2
Source: MDPI journal article supplement (doi:10.3390/nu15092047), 2023-04-24
Supplement: s1 [file s1]

**Table S1** List of evaluation results using AMSTAR 2. Reference numbers were randomized so that company names were not specified.

[illegible]
